# Supplementary material
Source: PubMed Central journal article supplement (PMC1751143)
Supplement: archdisch_archdischild;87_1_22__1.pdf [file archdisch_archdischild%3B87_1_22__1.pdf]

## Appendix 1

### Sites analysed

|                                                                                                                                                                 |
|-----------------------------------------------------------------------------------------------------------------------------------------------------------------|
| <a href="http://ctvia.org/">http://ctvia.org/</a>                                                                                                               |
| <a href="http://health.microworld.com/html/vaccine.html">http://health.microworld.com/html/vaccine.html</a>                                                     |
| <a href="http://home.iae.nl/users/lightnet/health/vaccination.htm">http://home.iae.nl/users/lightnet/health/vaccination.htm</a>                                 |
| <a href="http://home.sprynet.com/~gyrene/index.htm">http://home.sprynet.com/~gyrene/index.htm</a>                                                               |
| <a href="http://medicinegarden.com/Homeopathy/VACCINATION.html">http://medicinegarden.com/Homeopathy/VACCINATION.html</a>                                       |
| <a href="http://members.aol.com/ht_a/mccfhc/index.htm">http://members.aol.com/ht_a/mccfhc/index.htm</a>                                                         |
| <a href="http://members.aol.com/Tauwillow/index.htm">http://members.aol.com/Tauwillow/index.htm</a>                                                             |
| <a href="http://members.nbc.com/niin/vaccinationupdate/vac.up.html">http://members.nbc.com/niin/vaccinationupdate/vac.up.html</a>                               |
| <a href="http://members.theglobe.com/mstopp/IVYLEAGUE/">http://members.theglobe.com/mstopp/IVYLEAGUE/</a>                                                       |
| <a href="http://members.tripod.com/Dr_Sugi/vaccines.html">http://members.tripod.com/Dr_Sugi/vaccines.html</a>                                                   |
| <a href="http://mothernurture.co.nz/vaccination.htm">http://mothernurture.co.nz/vaccination.htm</a>                                                             |
| <a href="http://users.pandora.be/vaccine.damage.prevention/">http://users.pandora.be/vaccine.damage.prevention/</a>                                             |
| <a href="http://vaccineinfo.net/">http://vaccineinfo.net/</a>                                                                                                   |
| <a href="http://www.909shot.com/default.htm">http://www.909shot.com/default.htm</a>                                                                             |
| <a href="http://www.alanlam.demon.co.uk/vaccine.htm">http://www.alanlam.demon.co.uk/vaccine.htm</a>                                                             |
| <a href="http://www.alphaomega.se/english/vaccination.html">http://www.alphaomega.se/english/vaccination.html</a>                                               |
| <a href="http://www.alternamoms.com/vac.html">http://www.alternamoms.com/vac.html</a>                                                                           |
| <a href="http://www.alternativeparenting.com/">http://www.alternativeparenting.com/</a>                                                                         |
| <a href="http://www.argonet.co.uk/users/jabs/">http://www.argonet.co.uk/users/jabs/</a>                                                                         |
| <a href="http://www.avn.org.au/">http://www.avn.org.au/</a>                                                                                                     |
| <a href="http://www.bcity.com/harpub/pitcairn.htm">http://www.bcity.com/harpub/pitcairn.htm</a>                                                                 |
| <a href="http://www.bestfed.com/vaccination/">http://www.bestfed.com/vaccination/</a>                                                                           |
| <a href="http://www.cchc-mn.org/">http://www.cchc-mn.org/</a>                                                                                                   |
| <a href="http://www.ccid.org/index.htm">http://www.ccid.org/index.htm</a>                                                                                       |
| <a href="http://www.cco.net/~trifax/vaccine/vacmaste.html">http://www.cco.net/~trifax/vaccine/vacmaste.html</a>                                                 |
| <a href="http://www.chetday.com/links/vaccination.html">http://www.chetday.com/links/vaccination.html</a>                                                       |
| <a href="http://www.childbirthsolutions.com/content/postpartum/dispelling/">http://www.childbirthsolutions.com/content/postpartum/dispelling/</a>               |
| <a href="http://www.chronicillnet.org/">http://www.chronicillnet.org/</a>                                                                                       |
| <a href="http://www.cogforlife.org/">http://www.cogforlife.org/</a>                                                                                             |
| <a href="http://www.crosswinds.net/~vaxchoice/">http://www.crosswinds.net/~vaxchoice/</a>                                                                       |
| <a href="http://www.crosswinds.net/~vaxchoice/">http://www.crosswinds.net/~vaxchoice/</a>                                                                       |
| <a href="http://www.ctanet.fr/vaccination-information/">http://www.ctanet.fr/vaccination-information/</a>                                                       |
| <a href="http://www.dallasnw.quik.com/cyberella/index.htm">http://www.dallasnw.quik.com/cyberella/index.htm</a>                                                 |
| <a href="http://www.drcarley.com/id23.htm">http://www.drcarley.com/id23.htm</a>                                                                                 |
| <a href="http://www.drday.com/vaccination.htm">http://www.drday.com/vaccination.htm</a>                                                                         |
| <a href="http://www.drweed.com/newsletters/flu.html">http://www.drweed.com/newsletters/flu.html</a>                                                             |
| <a href="http://www.eaglefoundation.net/">http://www.eaglefoundation.net/</a>                                                                                   |
| <a href="http://www.enigami.com/~ckempf/vaccine.html">http://www.enigami.com/~ckempf/vaccine.html</a>                                                           |
| <a href="http://www.eurosolve.com/charity/bava/vaccination.html">http://www.eurosolve.com/charity/bava/vaccination.html</a>                                     |
| <a href="http://www.familiesonline.co.uk/topics/health/health_against_vaccine.htm">http://www.familiesonline.co.uk/topics/health/health_against_vaccine.htm</a> |
| <a href="http://www.forhealthfreedom.org/">http://www.forhealthfreedom.org/</a>                                                                                 |
| <a href="http://www.freedomofchoice.org/">http://www.freedomofchoice.org/</a>                                                                                   |
| <a href="http://www.garynull.com/issues/Vaccines/VaccinationActionFile.htm">http://www.garynull.com/issues/Vaccines/VaccinationActionFile.htm</a>               |

|                                                                                                                                                                                                       |
|-------------------------------------------------------------------------------------------------------------------------------------------------------------------------------------------------------|
| <a href="http://www.geko.net.au/~mark/Medical/Vax.html">http://www.geko.net.au/~mark/Medical/Vax.html</a>                                                                                             |
| <a href="http://www.geocities.com/~kasmom/vaccines.html">http://www.geocities.com/~kasmom/vaccines.html</a>                                                                                           |
| <a href="http://www.geocities.com/Heartland/8148/vac.html">http://www.geocities.com/Heartland/8148/vac.html</a>                                                                                       |
| <a href="http://www.geocities.com/HotSprings/1101/">http://www.geocities.com/HotSprings/1101/</a>                                                                                                     |
| <a href="http://www.geocities.com/HotSprings/1158/VACCINES.HTM">http://www.geocities.com/HotSprings/1158/VACCINES.HTM</a>                                                                             |
| <a href="http://www.geocities.com/HotSprings/Villa/2009/">http://www.geocities.com/HotSprings/Villa/2009/</a>                                                                                         |
| <a href="http://www.geocities.com/rnroy03570/">http://www.geocities.com/rnroy03570/</a>                                                                                                               |
| <a href="http://www.gn.apc.org/inquirer/vaccio.html">http://www.gn.apc.org/inquirer/vaccio.html</a>                                                                                                   |
| <a href="http://www.goodlight.net/nyvic/">http://www.goodlight.net/nyvic/</a>                                                                                                                         |
| <a href="http://www.goodlight.net/nyvic/">http://www.goodlight.net/nyvic/</a>                                                                                                                         |
| <a href="http://www.gval.com/">http://www.gval.com/</a>                                                                                                                                               |
| <a href="http://www.g-vision.com/vaccination.htm">http://www.g-vision.com/vaccination.htm</a>                                                                                                         |
| <a href="http://www.heall.com/body/healthupdates/vaccination/">http://www.heall.com/body/healthupdates/vaccination/</a>                                                                               |
| <a href="http://www.healthwell.com/hnbreakthroughs/jan99/vaccine.cfm?path=hw&amp;cond=12&amp;mcat=61">http://www.healthwell.com/hnbreakthroughs/jan99/vaccine.cfm?path=hw&amp;cond=12&amp;mcat=61</a> |
| <a href="http://www.healthy.net/clinic/familyhealthcenter/children/vaccination/articles.asp">http://www.healthy.net/clinic/familyhealthcenter/children/vaccination/articles.asp</a>                   |
| <a href="http://www.homestead.com/immunization/index.html">http://www.homestead.com/immunization/index.html</a>                                                                                       |
| <a href="http://www.iahf.com/20000222b.html">http://www.iahf.com/20000222b.html</a>                                                                                                                   |
| <a href="http://www.ias.org.nz">http://www.ias.org.nz</a>                                                                                                                                             |
| <a href="http://www.ideasign.com/chiliast/vaccine/dvm2.htm">http://www.ideasign.com/chiliast/vaccine/dvm2.htm</a>                                                                                     |
| <a href="http://www.ideasign.com/chiliast/vaccine/dvm2.htm">http://www.ideasign.com/chiliast/vaccine/dvm2.htm</a>                                                                                     |
| <a href="http://www.ino.it/~lois/vaccine.htm">http://www.ino.it/~lois/vaccine.htm</a>                                                                                                                 |
| <a href="http://www.intuitiveparenting.org/immunizations.html">http://www.intuitiveparenting.org/immunizations.html</a>                                                                               |
| <a href="http://www.ipav.org/">http://www.ipav.org/</a>                                                                                                                                               |
| <a href="http://www.lightparty.com/Health/HomeopathicAnswers.html">http://www.lightparty.com/Health/HomeopathicAnswers.html</a>                                                                       |
| <a href="http://www.linkny.com/~civitas/page103.html">http://www.linkny.com/~civitas/page103.html</a>                                                                                                 |
| <a href="http://www.lyghtforce.com/HomeopathyOnline/Issue2/voice.html">http://www.lyghtforce.com/HomeopathyOnline/Issue2/voice.html</a>                                                               |
| <a href="http://www.med.uni-muenchen.de/fachschafft/homeopathy/vaccine.htm">http://www.med.uni-muenchen.de/fachschafft/homeopathy/vaccine.htm</a>                                                     |
| <a href="http://www.mercola.com/article/vaccines/death.htm">http://www.mercola.com/article/vaccines/death.htm</a>                                                                                     |
| <a href="http://www.ms-society.ie/msnews/issue52/16vaccination.html">http://www.ms-society.ie/msnews/issue52/16vaccination.html</a>                                                                   |
| <a href="http://www.naturalmom.com/vacdebat.htm">http://www.naturalmom.com/vacdebat.htm</a>                                                                                                           |
| <a href="http://www.ncn.net/~wwithin/vaccine.htm">http://www.ncn.net/~wwithin/vaccine.htm</a>                                                                                                         |
| <a href="http://www.nexusmagazine.com//shakenbaby.html">http://www.nexusmagazine.com//shakenbaby.html</a>                                                                                             |
| <a href="http://www.odomnet.com/vaccines/index.htm">http://www.odomnet.com/vaccines/index.htm</a>                                                                                                     |
| <a href="http://www.oneflesh.org/Child-TOC.html">http://www.oneflesh.org/Child-TOC.html</a>                                                                                                           |
| <a href="http://www.ouralexander.org/">http://www.ouralexander.org/</a>                                                                                                                               |
| <a href="http://www.planetc1.com/cgi-bin/n/search.cgi?category=1&amp;keyword=vaccines">http://www.planetc1.com/cgi-bin/n/search.cgi?category=1&amp;keyword=vaccines</a>                               |
| <a href="http://www.pnc.com.au/~cafmr/coulter/vacc-deb.html">http://www.pnc.com.au/~cafmr/coulter/vacc-deb.html</a>                                                                                   |
| <a href="http://www.realitybytes.com.au/visa/newsletter.html">http://www.realitybytes.com.au/visa/newsletter.html</a>                                                                                 |
| <a href="http://www.rense.com/ufo2/massvacc.htm">http://www.rense.com/ufo2/massvacc.htm</a>                                                                                                           |
| <a href="http://www.salineguide.com/mom/">http://www.salineguide.com/mom/</a>                                                                                                                         |
| <a href="http://www.sumeria.net/health.htm">http://www.sumeria.net/health.htm</a>                                                                                                                     |
| <a href="http://www.tetrahedron.org/">http://www.tetrahedron.org/</a>                                                                                                                                 |

|                                                                                                                                                                                                                                                             |
|-------------------------------------------------------------------------------------------------------------------------------------------------------------------------------------------------------------------------------------------------------------|
| <a href="http://www.tinussmits.nl/english/dynamic.htm?main=pvs/dynamic.htm?main1=http://www.tinussmits.nl/english/pvs/intro.htm">http://www.tinussmits.nl/english/dynamic.htm?main=pvs/dynamic.htm?main1=http://www.tinussmits.nl/english/pvs/intro.htm</a> |
| <a href="http://www.trifax.org/vaccine/vacmaste.html">http://www.trifax.org/vaccine/vacmaste.html</a>                                                                                                                                                       |
| <a href="http://www.unc.edu/~aphillip/www/chf/index.htm">http://www.unc.edu/~aphillip/www/chf/index.htm</a>                                                                                                                                                 |
| <a href="http://www.vaccinechoice.org/">http://www.vaccinechoice.org/</a>                                                                                                                                                                                   |
| <a href="http://www.vaccinedamage-prevention.org/">http://www.vaccinedamage-prevention.org/</a>                                                                                                                                                             |
| <a href="http://www.vaccineinfo.net/">http://www.vaccineinfo.net/</a>                                                                                                                                                                                       |
| <a href="http://www.vaccines.bizland.com/">http://www.vaccines.bizland.com/</a>                                                                                                                                                                             |
| <a href="http://www.vaccines.net/">http://www.vaccines.net/</a>                                                                                                                                                                                             |
| <a href="http://www.vaccinfo.karoo.net/index.html">http://www.vaccinfo.karoo.net/index.html</a>                                                                                                                                                             |
| <a href="http://www.van.org.uk">http://www.van.org.uk</a>                                                                                                                                                                                                   |
| <a href="http://www.voicesofsafety.com/">http://www.voicesofsafety.com/</a>                                                                                                                                                                                 |
| <a href="http://www.vran.org/">http://www.vran.org/</a>                                                                                                                                                                                                     |
| <a href="http://www.webpak.net/~goffe5/">http://www.webpak.net/~goffe5/</a>                                                                                                                                                                                 |
| <a href="http://www.whale.to/vaccines.html">http://www.whale.to/vaccines.html</a>                                                                                                                                                                           |
| <a href="http://www.woodmed.com/">http://www.woodmed.com/</a>                                                                                                                                                                                               |
